# Supplementary material
Source: PubMed Central journal article supplement (PMC6821959)
Supplement: AEM.01255-19-s0001.pdf [file AEM.01255-19-s0001.pdf]

1 **Seeking to improve feed efficiency in pigs through microbial modulation via fecal**  
2 **microbiota transplantation in sows and dietary supplementation of offspring with inulin**

3

4 Ursula M. McCormack<sup>1,2†</sup>, Tânia Curião<sup>1†</sup>, Barbara U. Metzler-Zebeli<sup>3</sup>, Toby Wilkinson<sup>4</sup>,  
5 Henry Reyer<sup>5</sup>, Fiona Crispie<sup>6,7</sup>, Paul D. Cotter<sup>6,7</sup>, Christopher J. Creevey<sup>4</sup>, Gillian E.  
6 Gardiner<sup>2</sup> and Peadar G. Lawlor<sup>1\*</sup>

7

8

9 † Both authors contributed equally to this work.

10 <sup>1</sup>Teagasc, Pig Development Department, Animal and Grassland Research and Innovation Centre,  
11 Moorepark, Fermoy, Co. Cork, Ireland; <sup>2</sup>Department of Science, Waterford Institute of Technology,  
12 Co. Waterford, Ireland; <sup>3</sup>Department of Farm Animals and Veterinary Public Health, University  
13 Clinic for Swine, University of Veterinary Medicine Vienna, Veterinaerplatz 1, 1210 Vienna,  
14 Austria; <sup>4</sup>Animal and Microbial Sciences, Institute of Biological, Environmental and Rural Sciences  
15 (IBERS), Aberystwyth University, Aberystwyth SY23 3FG, UK, <sup>5</sup>Leibniz Institute for Farm Animal  
16 Biology (FBN), Dummerstorf, Germany; <sup>6</sup>Teagasc Food Research Centre, Moorepark, Fermoy, Co.  
17 Cork, Ireland; <sup>7</sup>APC Microbiome Institute, Cork, Ireland.

18

19 Running title: Microbial modulation to alter feed efficiency in pigs

20 \*Corresponding author: Peadar Lawlor, Teagasc, Pig Development Department, Animal and  
21 Grassland Research and Innovation Centre, Moorepark, Fermoy, Co. Cork, Ireland. Tel.:  
22 +353 (0) 25 42217; email: [peadar.lawlor@teagasc.ie](mailto:peadar.lawlor@teagasc.ie).

**Table S1. Significant differences in parameters in offspring due to the effect of the interaction between fecal microbiota transplantation (FMT) in sows and dietary supplementation of offspring with inulin for 42 days post-weaning<sup>1</sup>**

| Sow treatment                                                   | Control <sup>2</sup>  |                     | FMTp <sup>3</sup>     |                       | S.E.M.  | Interaction | P-value |           |
|-----------------------------------------------------------------|-----------------------|---------------------|-----------------------|-----------------------|---------|-------------|---------|-----------|
|                                                                 | Control <sup>4</sup>  | Inulin <sup>5</sup> | Control               | Inulin                |         |             | Sow     | Offspring |
| <b>Weaning</b>                                                  |                       |                     |                       |                       |         |             |         |           |
| <i>G_Streptococcus</i>                                          | 0.73 <sup>b</sup>     | 0.31 <sup>b</sup>   | 2.24 <sup>a</sup>     | 3.71 <sup>a</sup>     | 0.134   | <0.001      | <0.001  | 0.68      |
| <i>G_Butyricimonas</i>                                          | 0.04 <sup>b</sup>     | 0.21 <sup>b</sup>   | 0.08 <sup>b</sup>     | 2.56 <sup>a</sup>     | 0.018   | <0.001      | <0.001  | <0.001    |
| <i>G_Bifidobacterium</i>                                        | 0.09 <sup>b</sup>     | 0.07 <sup>b</sup>   | 0.10 <sup>b</sup>     | 2.07 <sup>a</sup>     | 0.027   | 0.001       | 0.04    | 0.03      |
| <i>G_Faecalibacterium</i>                                       | 0.89 <sup>a</sup>     | 0.20 <sup>b</sup>   | 0.23 <sup>b</sup>     | 0.16 <sup>b</sup>     | 0.099   | <0.001      | 0.003   | 0.001     |
| <i>G_Dorea</i>                                                  | 0.20 <sup>a,b</sup>   | 0.57 <sup>a</sup>   | 0.03 <sup>b</sup>     | 0.31 <sup>a</sup>     | 0.009   | <0.001      | 0.01    | <0.001    |
| <i>G_Terrisporobacter</i>                                       | 0.13 <sup>a,b</sup>   | 0.03 <sup>b</sup>   | 0.31 <sup>a</sup>     | 0.12 <sup>a,b</sup>   | 0.012   | 0.003       | 0.007   | 0.005     |
| Caffeine metabolism                                             | 0.0011 <sup>a</sup>   | 0.0003 <sup>b</sup> | 0.0014 <sup>a</sup>   | 0.0007 <sup>a,b</sup> | 0.00014 | 0.001       | 0.001   | 0.005     |
| <b>Day 50</b>                                                   |                       |                     |                       |                       |         |             |         |           |
| <i>P_Proteobacteria</i>                                         | 2.95 <sup>a</sup>     | 1.10 <sup>b</sup>   | 4.68 <sup>a</sup>     | 2.65 <sup>a,b</sup>   | 0.789   | 0.004       | <0.001  | <0.001    |
| 1,1,1-Trichloro-2,2-bis(4-chlorophenyl)ethane (DDT) degradation | 0.0013 <sup>b</sup>   | 0.0005 <sup>b</sup> | 0.0017 <sup>a,b</sup> | 0.0034 <sup>a</sup>   | 0.00026 | 0.001       | <0.001  | 0.61      |
| <b>Day 65</b>                                                   |                       |                     |                       |                       |         |             |         |           |
| Alpha-linolenic acid metabolism                                 | 0.0012 <sup>a,b</sup> | 0.0008 <sup>b</sup> | 0.0028 <sup>a</sup>   | 0.0007 <sup>b</sup>   | 0.00041 | <0.001      | 0.15    | <0.001    |
| <b>Day 100</b>                                                  |                       |                     |                       |                       |         |             |         |           |
| Body weight (kg)                                                | 59.0 <sup>a</sup>     | 58.6 <sup>a</sup>   | 51.2 <sup>b</sup>     | 53.7 <sup>a,b</sup>   | 1.31    | <0.001      | <0.001  | 0.41      |
| <i>P_Actinobacteria</i>                                         | 0.19 <sup>b</sup>     | 0.64 <sup>a,b</sup> | 1.15 <sup>a</sup>     | 0.50 <sup>a,b</sup>   | 0.170   | 0.004       | 0.03    | 0.76      |
| <i>G_Campylobacter</i>                                          | 1.07 <sup>b</sup>     | 0.85 <sup>b</sup>   | 3.22 <sup>a</sup>     | 1.38 <sup>a,b</sup>   | 0.567   | <0.001      | 0.002   | 0.01      |
| <i>G_Peptococcus</i>                                            | 0.08 <sup>b</sup>     | 1.18 <sup>a</sup>   | 0.95 <sup>a</sup>     | 0.19 <sup>b</sup>     | 0.032   | <0.001      | 0.49    | 0.24      |
| <i>G_Bifidobacterium</i>                                        | 0.03 <sup>a,b</sup>   | 0.04 <sup>a,b</sup> | 0.23 <sup>a</sup>     | 0.01 <sup>b</sup>     | 0.004   | 0.006       | 0.39    | 0.05      |
| <i>G_Sutterella</i>                                             | 0.002 <sup>b</sup>    | 0.127 <sup>a</sup>  | 0.158 <sup>a</sup>    | 0.189 <sup>a</sup>    | 0.0003  | 0.004       | 0.005   | 0.01      |
| <b>Day 130</b>                                                  |                       |                     |                       |                       |         |             |         |           |
| <i>P_Fibrobacteres</i>                                          | 0.37 <sup>a</sup>     | 0.35 <sup>a</sup>   | 0.01 <sup>b</sup>     | 0.39 <sup>a</sup>     | 0.001   | <0.001      | <0.001  | 0.008     |

| Sow treatment                                     | Control <sup>2</sup> |                     | FMTp <sup>3</sup>   |                      | S.E.M. | P-value     |        |           |
|---------------------------------------------------|----------------------|---------------------|---------------------|----------------------|--------|-------------|--------|-----------|
|                                                   | Control <sup>4</sup> | Inulin <sup>5</sup> | Control             | Inulin               |        | Interaction | Sow    | Offspring |
| <i>G_Sphaerochaeta</i>                            | 18.00 <sup>a</sup>   | 9.96 <sup>a,b</sup> | 4.51 <sup>b</sup>   | 13.38 <sup>a,b</sup> | 2.442  | 0.008       | 0.07   | 0.41      |
| <i>G_Oribacterium</i>                             | 2.76 <sup>a</sup>    | 1.80 <sup>a,b</sup> | 0.73 <sup>b</sup>   | 1.80 <sup>a,b</sup>  | 0.434  | 0.004       | 0.01   | 0.37      |
| <i>G_Blautia</i>                                  | 1.39 <sup>a,b</sup>  | 1.36 <sup>a,b</sup> | 0.61 <sup>b</sup>   | 2.06 <sup>a</sup>    | 0.374  | 0.006       | 0.13   | 0.02      |
| <i>G_Faecalitalea</i>                             | 0.42 <sup>a</sup>    | 0.20 <sup>a,b</sup> | 0.06 <sup>b</sup>   | 0.27 <sup>a,b</sup>  | 0.031  | 0.001       | 0.02   | 0.29      |
| <i>G_Fibrobacter</i>                              | 0.367 <sup>a</sup>   | 0.351 <sup>a</sup>  | 0.004 <sup>b</sup>  | 0.092 <sup>a</sup>   | 0.001  | <0.001      | <0.001 | 0.008     |
| <i>G_Bifidobacterium</i>                          | 0.03 <sup>b</sup>    | 0.46 <sup>a,b</sup> | 0.82 <sup>a</sup>   | 0.30 <sup>a,b</sup>  | 0.007  | 0.004       | 0.02   | 0.15      |
| <i>G_Acetanaerobacterium</i>                      | 0.10 <sup>a,b</sup>  | 0.02 <sup>b</sup>   | 0.90 <sup>a</sup>   | 0.11 <sup>a,b</sup>  | 0.005  | 0.007       | 0.004  | 0.007     |
| Limonene and pinene degradation                   | 0.22 <sup>b</sup>    | 0.31 <sup>a</sup>   | 0.29 <sup>a</sup>   | 0.27 <sup>a,b</sup>  | 0.198  | <0.001      | 0.14   | 0.01      |
| Fatty acid metabolism                             | 0.57 <sup>b</sup>    | 0.72 <sup>a</sup>   | 0.69 <sup>a,b</sup> | 0.66 <sup>a,b</sup>  | 0.527  | 0.001       | 0.32   | 0.03      |
| Purine metabolism                                 | 5.0 <sup>a</sup>     | 4.7 <sup>b</sup>    | 4.6 <sup>b</sup>    | 4.8 <sup>b</sup>     | 4.511  | 0.002       | 0.05   | 0.65      |
| <b>Day 140</b>                                    |                      |                     |                     |                      |        |             |        |           |
| Body weight (kg)                                  | 104.9 <sup>a</sup>   | 103.9 <sup>a</sup>  | 94.3 <sup>b</sup>   | 96.8 <sup>b</sup>    | 1.29   | <0.001      | <0.001 | 0.59      |
| Carcass weight (kg)                               | 81.0 <sup>a</sup>    | 80.1 <sup>a</sup>   | 72.1 <sup>b</sup>   | 75.0 <sup>b</sup>    | 1.62   | 0.01        | <0.001 | 0.54      |
| Carcass muscle depth (mm)                         | 53.5 <sup>a,b</sup>  | 52.1 <sup>b</sup>   | 52.5 <sup>a,b</sup> | 53.8 <sup>a</sup>    | 0.71   | 0.05        | 0.61   | 0.92      |
| White blood cells ( $\times 10^3$ cells/ $\mu$ L) | 28.4 <sup>a</sup>    | 21.6 <sup>b</sup>   | 24.7 <sup>a,b</sup> | 26.2 <sup>a,b</sup>  | 1.54   | 0.01        | 0.78   | 0.09      |
| Hemoglobin (g/dL)                                 | 13.9 <sup>a,b</sup>  | 13.6 <sup>a,b</sup> | 12.7 <sup>b</sup>   | 14.0 <sup>a</sup>    | 0.39   | 0.05        | 0.31   | 0.16      |
| <b>Day 35 – 140</b>                               |                      |                     |                     |                      |        |             |        |           |
| RFI <sup>7</sup> (g/day)                          | 13.7 <sup>a</sup>    | 25.2 <sup>a</sup>   | -13.9 <sup>b</sup>  | -20.9 <sup>b</sup>   | 15.96  | 0.05        | 0.02   | 0.88      |

| Sow treatment                                                   | Control <sup>2</sup> |                       | FMTp <sup>3</sup>    |                       | S.E.M.  | P-value     |        |           |
|-----------------------------------------------------------------|----------------------|-----------------------|----------------------|-----------------------|---------|-------------|--------|-----------|
|                                                                 | Control <sup>4</sup> | Inulin <sup>5</sup>   | Control              | Inulin                |         | Interaction | Sow    | Offspring |
| <b>Jejunum</b>                                                  |                      |                       |                      |                       |         |             |        |           |
| Number of goblet cells per $\mu\text{m}$ villus height          | 0.14 <sup>a,b</sup>  | 0.13 <sup>b</sup>     | 0.16 <sup>a</sup>    | 0.16 <sup>a</sup>     | 0.007   | 0.001       | <0.001 | 0.93      |
| <b>Ileum</b>                                                    |                      |                       |                      |                       |         |             |        |           |
| <i>G_Prevotella</i>                                             | 0.36 <sup>b</sup>    | 3.35 <sup>a</sup>     | 2.99 <sup>a</sup>    | 4.54 <sup>a</sup>     | 0.164   | <0.001      | 0.004  | 0.002     |
| <i>G_Sphaerochaeta</i>                                          | 2.78 <sup>a</sup>    | 0.32 <sup>b</sup>     | 0.30 <sup>b</sup>    | 1.04 <sup>b</sup>     | 0.143   | <0.001      | 0.16   | 0.19      |
| <i>G_Chlamydia</i> <sup>6</sup>                                 | 2.61 <sup>a</sup>    | 0.20 <sup>b</sup>     | 0.63 <sup>b</sup>    | 0.30 <sup>b</sup>     | 0.086   | <0.001      | 0.22   | <0.001    |
| Glycosphingolipid biosynthesis - ganglio series                 | 0.08 <sup>b</sup>    | 0.13 <sup>a</sup>     | 0.08 <sup>b</sup>    | 0.14 <sup>a</sup>     | 0.063   | <0.001      | 0.76   | <0.001    |
| Glycosphingolipid biosynthesis - globo series                   | 0.18 <sup>b</sup>    | 0.24 <sup>a</sup>     | 0.19 <sup>b</sup>    | 0.26 <sup>a</sup>     | 0.159   | <0.001      | 0.36   | <0.001    |
| Nitrotoluene degradation                                        | 0.08 <sup>a,b</sup>  | 0.06 <sup>b</sup>     | 0.10 <sup>a</sup>    | 0.08 <sup>a,b</sup>   | 0.047   | 0.008       | 0.02   | 0.01      |
| Biosynthesis of ansamycins                                      | 0.15 <sup>a,b</sup>  | 0.14 <sup>b</sup>     | 0.17 <sup>a,b</sup>  | 0.18 <sup>a</sup>     | 0.129   | <0.001      | <0.001 | 0.64      |
| Secondary bile acid biosynthesis                                | 0.002                | 0.012                 | 0.008                | 0.019                 | 0.0009  | <0.001      | 0.001  | <0.001    |
| Porphyrin and chlorophyll metabolism                            | 1.73 <sup>a</sup>    | 1.43 <sup>b</sup>     | 1.60 <sup>b</sup>    | 1.34 <sup>b</sup>     | 1.206   | 0.007       | 0.22   | 0.001     |
| Selenocompound metabolism                                       | 0.86                 | 0.82                  | 0.81                 | 0.78                  | 0.755   | <0.001      | <0.001 | 0.002     |
| Ether lipid metabolism                                          | 0.002 <sup>b</sup>   | 0.001 <sup>b</sup>    | 0.006 <sup>a,b</sup> | 0.009 <sup>a</sup>    | 0.0005  | <0.001      | <0.001 | 0.64      |
| Various types of N-glycan biosynthesis                          | 0.0022 <sup>a</sup>  | 0.0009 <sup>a,b</sup> | 0.0005 <sup>b</sup>  | 0.0013 <sup>a,b</sup> | 0.00025 | 0.001       | 0.04   | 0.69      |
| 1,2,1-Trichloro-2,2-bis(4-chlorophenyl)ethane (DDT) degradation | 0.002 <sup>a</sup>   | 0.001 <sup>b</sup>    | 0.001 <sup>b</sup>   | 0.002 <sup>a</sup>    | 0.0002  | 0.002       | 0.04   | 0.69      |
| Acetic acid ( $\mu\text{mol/g}$ digesta)                        | 14.9 <sup>b</sup>    | 10.9 <sup>c</sup>     | 10.4 <sup>c</sup>    | 16.7 <sup>a</sup>     | 1.65    | 0.02        | 0.85   | 0.52      |
| Propionic acid                                                  | 5.5 <sup>a</sup>     | 1.8 <sup>b</sup>      | 4.1 <sup>ab</sup>    | 3.9 <sup>ab</sup>     | 0.83    | 0.005       | 0.28   | 0.01      |
| <b>Cecum</b>                                                    |                      |                       |                      |                       |         |             |        |           |
| <i>P_Proteobacteria</i>                                         | 3.79 <sup>b</sup>    | 4.44 <sup>a,b</sup>   | 7.50 <sup>a</sup>    | 5.60 <sup>a,b</sup>   | 2.832   | 0.009       | 0.003  | 0.95      |
| <i>G_Bacteroides</i>                                            | 1.27 <sup>b</sup>    | 1.57 <sup>b</sup>     | 6.77 <sup>a</sup>    | 1.58 <sup>b</sup>     | 0.715   | <0.001      | 0.006  | 0.04      |
| <i>G_Flavonifractor</i>                                         | 0.09 <sup>b</sup>    | 0.23 <sup>a,b</sup>   | 0.34 <sup>a</sup>    | 0.10 <sup>b</sup>     | 0.052   | 0.002       | 0.27   | 0.66      |
| Fructose and mannose metabolism                                 | 1.72 <sup>b</sup>    | 1.79 <sup>b</sup>     | 2.20 <sup>a</sup>    | 1.74 <sup>b</sup>     | 1.607   | <0.001      | 0.002  | 0.006     |
| Folate biosynthesis                                             | 0.57 <sup>b</sup>    | 0.61 <sup>b</sup>     | 0.67 <sup>a</sup>    | 0.56 <sup>b</sup>     | 0.533   | <0.001      | 0.17   | 0.11      |
| D-alanine metabolism                                            | 0.29 <sup>a</sup>    | 0.28 <sup>a</sup>     | 0.27 <sup>b</sup>    | 0.29 <sup>a</sup>     | 0.251   | <0.001      | <0.001 | 0.009     |
| Phenylalanine, tyrosine and tryptophan biosynthesis             | 1.29 <sup>a,b</sup>  | 1.36 <sup>a,b</sup>   | 1.41 <sup>a</sup>    | 1.22 <sup>b</sup>     | 1.150   | 0.005       | 0.83   | 0.14      |
| Streptomycin biosynthesis                                       | 0.43 <sup>a,b</sup>  | 0.45 <sup>a,b</sup>   | 0.49 <sup>a</sup>    | 0.40 <sup>b</sup>     | 0.373   | 0.004       | 0.86   | 0.08      |
| Galactose metabolism                                            | 0.83 <sup>b</sup>    | 0.89 <sup>a,b</sup>   | 1.10 <sup>a</sup>    | 0.82 <sup>a,b</sup>   | 0.732   | <0.001      | 0.07   | 0.05      |
| N-glycan biosynthesis                                           | 0.028 <sup>b</sup>   | 0.034 <sup>a,b</sup>  | 0.041 <sup>a</sup>   | 0.028 <sup>b</sup>    | 0.0241  | 0.001       | 0.25   | 0.20      |

| Sow treatment                                            | Control <sup>2</sup> |                       | FMTp <sup>3</sup>   |                      | S.E.M.  | P-value     |        |           |
|----------------------------------------------------------|----------------------|-----------------------|---------------------|----------------------|---------|-------------|--------|-----------|
|                                                          | Control <sup>4</sup> | Inulin <sup>5</sup>   | Control             | Inulin               |         | Interaction | Sow    | Offspring |
| Butyric acid (μmol/g digesta)                            | 9.5 <sup>a</sup>     | 9.8 <sup>a</sup>      | 6.9 <sup>b</sup>    | 1.5 <sup>c</sup>     | 1.02    | <0.001      | <0.001 | 0.01      |
| Valeric acid (μmol/g digesta)                            | 6.1 <sup>b</sup>     | 8.9 <sup>a</sup>      | 6.6 <sup>b</sup>    | 4.7 <sup>c</sup>     | 0.92    | 0.01        | 0.04   | 0.89      |
| Isovaleric acid (μmol/g digesta)                         | 2.4 <sup>b</sup>     | 2.9 <sup>b</sup>      | 5.3 <sup>a</sup>    | 1.4 <sup>c</sup>     | 0.54    | <0.001      | 0.83   | 0.003     |
| <b>Colon</b>                                             |                      |                       |                     |                      |         |             |        |           |
| <i>P_Lentisphaerae</i>                                   | 0.18 <sup>a,b</sup>  | 0.42 <sup>a</sup>     | 0.25 <sup>a</sup>   | 0.06 <sup>b</sup>    | 0.028   | 0.005       | 0.15   | 0.51      |
| Steroid hormone biosynthesis                             | 0.04 <sup>b</sup>    | 0.05 <sup>a,b</sup>   | 0.09 <sup>a</sup>   | 0.05 <sup>a,b</sup>  | 0.029   | 0.007       | 0.04   | 0.09      |
| Retinol metabolism                                       | 0.027 <sup>b</sup>   | 0.037 <sup>a,b</sup>  | 0.047 <sup>a</sup>  | 0.029 <sup>a,b</sup> | 0.0213  | 0.003       | 0.47   | 0.15      |
| Glycine, serine and threonine metabolism                 | 1.91 <sup>a</sup>    | 1.88 <sup>a,b</sup>   | 1.83 <sup>b</sup>   | 1.92 <sup>a</sup>    | 1.794   | 0.003       | 0.17   | 0.09      |
| Glycosphingolipid biosynthesis-lacto and neolacto series | 0.0005 <sup>b</sup>  | 0.0008 <sup>a,b</sup> | 0.0011 <sup>a</sup> | 0.0003 <sup>c</sup>  | 0.00029 | <0.001      | 0.49   | 0.08      |
| Isobutyric acid (μmol/g digesta)                         | 4.4 <sup>b</sup>     | 3.9 <sup>b</sup>      | 13.6 <sup>a</sup>   | 6.5 <sup>b</sup>     | 2.14    | 0.02        | 0.01   | 0.15      |

<sup>1</sup>Least square means and pooled standard error of the mean are presented. Sows: <sup>2</sup>Control (n=11) and <sup>3</sup>FMT procedure (FMTp; n=11); Piglets: <sup>4</sup>Control (n=16), <sup>5</sup>Inulin (n=16) for the first 6 weeks post-weaning. P\_ indicates phylum; G\_ indicates genus, <sup>6</sup>Also reflects relative abundance at phylum level (i.e. *Chlamydiae*). Compositional and predicted functional differences are depicted as median relative abundance values. <sup>7</sup>RFI: residual feed intake measured between day 35 and 140 of age.

<sup>a,b,c</sup> Within each row, values that do not share a common superscript are significantly different (P≤0.05).

**Table S2. Effect of fecal microbiota transplantation (FMT) in sows and/or dietary supplementation of offspring with inulin for 42 days post-weaning on number of operational taxonomic units in the offspring feces and digesta**

| Timepoint/<br>intestinal site | Control sow          |                     | FMTp sow             |                     | Control sow | FMTp sow | Control<br>offspring | Inulin<br>offspring |
|-------------------------------|----------------------|---------------------|----------------------|---------------------|-------------|----------|----------------------|---------------------|
|                               | Control<br>offspring | Inulin<br>offspring | Control<br>offspring | Inulin<br>offspring |             |          |                      |                     |
| <b>Day 28 (Weaning)</b>       | 301                  | 294                 | 346                  | 304                 | 406         | 440      | 448                  | 410                 |
| <b>Day 50</b>                 | 148                  | 180                 | 221                  | 148                 | 226         | 266      | 266                  | 232                 |
| <b>Day 65</b>                 | 29                   | 23                  | 20                   | 32                  | 42          | 47       | 45                   | 44                  |
| <b>Day 100</b>                | 387                  | 302                 | 337                  | 336                 | 438         | 417      | 446                  | 400                 |
| <b>Day 130</b>                | 335                  | 375                 | 297                  | 358                 | 460         | 431      | 421                  | 467                 |
| <b>Ileum</b>                  | 43                   | 27                  | 31                   | 36                  | 44          | 45       | 48                   | 38                  |
| <b>Cecum</b>                  | 165                  | 129                 | 229                  | 179                 | 217         | 275      | 275                  | 220                 |
| <b>Colon</b>                  | 227                  | 230                 | 247                  | 194                 | 321         | 322      | 336                  | 304                 |

**Table S3. Composition and chemical analysis of all diets used in the study (on an as-fed basis; g/Kg)**

| Diet Type                        | Starter |        | Link    |        | Weaner  |        | Finisher | Sow      |           |
|----------------------------------|---------|--------|---------|--------|---------|--------|----------|----------|-----------|
|                                  | Control | Inulin | Control | Inulin | Control | Inulin |          | Pregnant | Lactation |
| Barley                           | 0.0     | 0.0    | 0.0     | 0.0    | 24.8    | 25.3   | 38.5     | 89.7     | 34.9      |
| Wheat                            | 22.2    | 19.1   | 39.9    | 36.9   | 43.1    | 36.9   | 40.4     | 0.0      | 43.2      |
| Maize                            | 8.0     | 8.0    | 0.0     | 0.0    | 0.0     | 0.0    | 0.0      | 0.0      | 0.0       |
| Soya                             | 16.9    | 19.7   | 22.9    | 24.7   | 20.0    | 21.4   | 17.5     | 7.0      | 15.0      |
| Full fat soya                    | 10.0    | 7.0    | 7.0     | 5.0    | 5.0     | 5.0    | 0.0      | 0.0      | 0.0       |
| Inulin                           | 0.0     | 2.0    | 0.0     | 2.0    | 0.0     | 3.0    | 0.0      | 0.0      | 0.0       |
| Lactofeed 70 <sup>1</sup>        | 20.0    | 20.0   | 20.0    | 20.0   | 0.0     | 0.0    | 0.0      | 0.0      | 0.0       |
| Skim milk powder                 | 12.5    | 12.5   | 5.0     | 5.0    | 0.0     | 0.0    | 0.0      | 0.0      | 0.0       |
| Soya oil                         | 7.5     | 8.8    | 2.5     | 3.6    | 4.0     | 5.3    | 10.0     | 10.0     | 40.0      |
| Lysine HCl (78.8)                | 0.5     | 0.4    | 0.4     | 0.4    | 0.5     | 0.43   | 4.0      | 1.0      | 3.5       |
| DL-Methionine                    | 0.3     | 0.4    | 0.2     | 0.3    | 0.2     | 0.2    | 1.0      | 1.0      | 1.0       |
| L-Threonine (98)                 | 0.2     | 0.2    | 0.2     | 0.02   | 0.2     | 0.2    | 1.5      | 0.0      | 1.0       |
| L-Tryptophan                     | 0.09    | 0.09   | 0.05    | 0.06   | 0.02    | 0.02   | 0.0      | 0.0      | 0.0       |
| Vitamin and mineral mix          | 0.3     | 0.3    | 0.3     | 0.3    | 0.3     | 0.3    | 1.0      | 1.5      | 1.5       |
| Natuphos 5000 FTU/g <sup>5</sup> | 0.01    | 0.01   | 0.01    | 0.01   | 0.01    | 0.01   | 0.1      | 0.1      | 0.1       |

| Diet Type                          | Starter |        | Link    |        | Weaner  |        | Finisher | Sow      |           |
|------------------------------------|---------|--------|---------|--------|---------|--------|----------|----------|-----------|
|                                    | Control | Inulin | Control | Inulin | Control | Inulin |          | Pregnant | Lactation |
| Salt feed grade                    | 0.3     | 0.3    | 0.3     | 0.3    | 0.3     | 0.3    | 3.0      | 4.0      | 4.0       |
| Dicalcium phosphate                | 0.1     | 0.1    | 0.1     | 0.1    | 0.6     | 0.6    | 2.0      | 5.0      | 5.0       |
| Limestone flour                    | 1.1     | 1.1    | 1.1     | 1.1    | 0.9     | 0.9    | 13.0     | 11.0     | 12.0      |
| <b>Chemical analysis (g/Kg DM)</b> |         |        |         |        |         |        |          |          |           |
| Crude protein                      | 235.9   | 252.8  | 211.0   | 205.4  | 195.7   | 172.1  | 161      | 119      | 148       |
| Crude fibre                        | 19.8    | 23.4   | 34.8    | 37.5   | 38.9    | 31.7   | 24       | 32       | 25        |
| Crude ash                          | 66.2    | 63.5   | 48.3    | 45.4   | 44.6    | 49.8   | 41       | 37       | 41        |
| Ether extract                      | 114.7   | 57.9   | 70.7    | 27.2   | 33.2    | 63.4   | 27       | 29       | 63        |
| DE MJ/kg <sup>6</sup>              | 17.9    | 17.0   | 16.9    | 16.0   | 15.9    | 16.3   | 16.3     | 15.6     | 16.8      |
| NE (IFIP) <sup>7</sup>             | 11.43   | 10.25  | 10.55   | 9.78   | 9.50    | 10.45  | 9.8      | 9.5      | 10.5      |
| <b>Amino acids (g/Kg)</b>          |         |        |         |        |         |        |          |          |           |
| Lysine                             | 16.2    | 15.0   | 13.0    | 11.1   | 6.4     | 9.9    | 11.50    | 6.50     | 9.90      |
| Methionine                         | 6.8     | 5.7    | 4.5     | 3.6    | 2.1     | 3.4    | 3.70     | 2.00     | 3.40      |
| Meth + Cyst                        | 9.7     | 9.0    | 7.9     | 6.8    | 4.7     | 6.4    | 7.40     | 5.00     | 6.80      |
| Threonine                          | 10.5    | 9.8    | 8.7     | 7.5    | 4.5     | 6.5    | 7.90     | 4.60     | 6.70      |
| Tryptophan                         | 3.6     | 3.3    | 2.6     | 2.2    | 1.6     | 2.0    | 1.50     | 1.20     | 1.40      |

<sup>1</sup>Lactofeed 70 contains 70% lactose, 11.5% protein, 0.5% oil, 7.5% ash and 0.5% fibre (Volac, Cambridge, UK).



<sup>2</sup>Premix provided per Kg of complete diet: Copper sulphate 7H<sub>2</sub>O, 62 g; Ferrous sulphate monohydrate, 450 g; Manganese oxide, 60 g; Zinc oxide, 150 g; Potassium iodate, 1 g; Sodium selenite, 0.6 g; Cu, 155 mg; Fe, 90 mg; Mn, 47 mg; Zn, 120 mg, I, 0.6 mg; Se, 0.3 mg; vitamin A, 6000 IU; vitamin D<sub>3</sub>, 1000 IU; vitamin E, 100 IU; vitamin K, 4 mg; vitamin B<sub>12</sub>, 15 µg; riboflavin, 2 mg; nicotinic acid, 12 mg; pantothenic acid, 10 mg; choline chloride, 250 mg; vitamin B<sub>1</sub>, 2 mg; vitamin B<sub>6</sub>, 3 mg; Endox, 60 g.

<sup>3</sup> Premix provided per Kg of complete diet: Copper sulphate 7H<sub>2</sub>O, 60 g; Ferrous sulphate monohydrate, 120 g; Manganese oxide, 40 g; Zinc oxide, 100 g; Potassium iodate, 0.5 g; Sodium selenite, 0.4 g; Cu, 15 mg; Fe, 24 mg; Mn, 31 mg; Zn, 80 mg, I, 0.3 mg; Se, 0.2 mg; vitamin A, 2000 IU; vitamin D<sub>3</sub>, 500 IU; vitamin E, 40 IU; vitamin K, 4 mg; vitamin B<sub>12</sub>, 15 µg; riboflavin, 2 mg; nicotinic acid, 12 mg; pantothenic acid, 10 mg; vitamin B<sub>1</sub>, 2 mg; vitamin B<sub>6</sub>, 3 mg.

<sup>4</sup> Premix provided per Kg of complete diet: Copper sulphate 7H<sub>2</sub>O, 60 g; Ferrous sulphate monohydrate, 200 g; Manganese oxide, 80 g; Zinc oxide, 100 g; Potassium iodate, 1 g; Sodium selenite, 0.4 g; Cu, 15 mg; Fe, 70 mg; Mn, 62 mg; Zn, 80 mg, I, 0.6 mg; Se, 0.2 mg; vitamin A, 1000 IU; vitamin D<sub>3</sub>, 1000 IU; vitamin E, 100 IU; vitamin K, 2 mg; vitamin B<sub>12</sub>, 15 µg; riboflavin, 5 mg; nicotinic acid, 12 mg; pantothenic acid, 10 mg; choline chloride, 500 mg; Biotin, 200 mg; Folic acid, 5 g; vitamin B<sub>1</sub>, 2 mg; vitamin B<sub>6</sub>, 3 mg.

<sup>5</sup> Phytase: Natuphos – BASF; 5000 FTU/gm equal to 500 FTU per Kg finished feed.

<sup>6</sup>Digestible energy is megajoules per kilogram of dry matter (DE= 4168-9.1\*ASH +1.9\*CP+3.9\*EE-3.6\*NDF)

<sup>7</sup>Calculated values

**A. Feces at weaning**

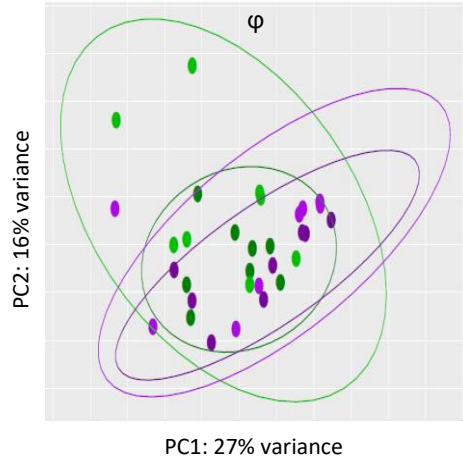

**B. Feces at 50 days old**

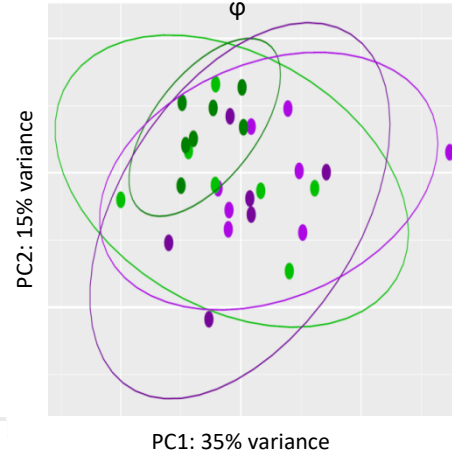

**C. Feces at 65 days old**

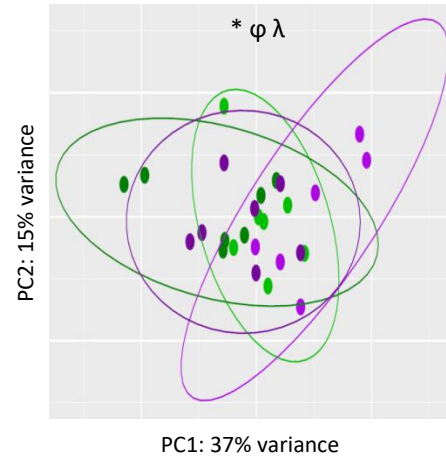

**D. Feces at 100 days old**

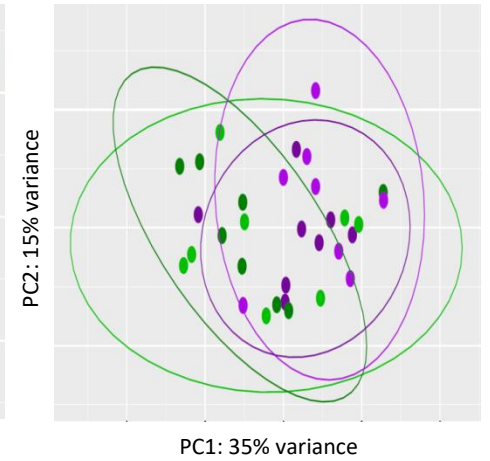

**E. Feces at 130 days old**

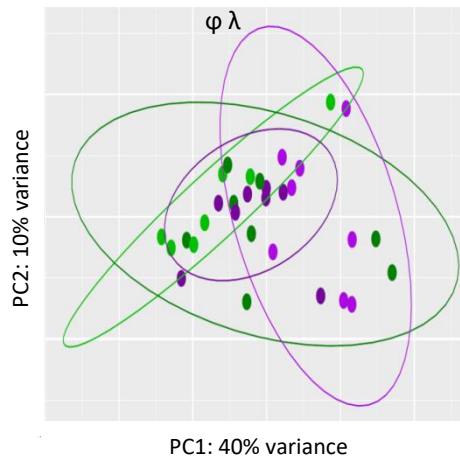

**F. Ileal digesta**

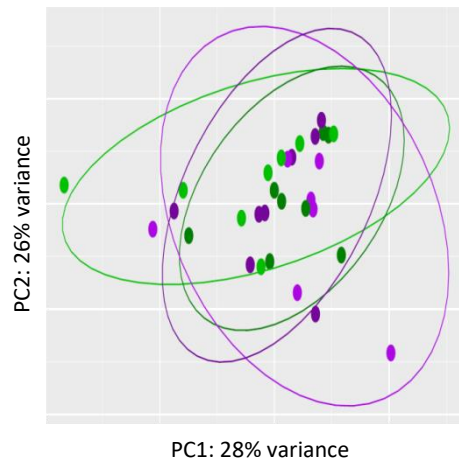

**G. Cecal digesta**

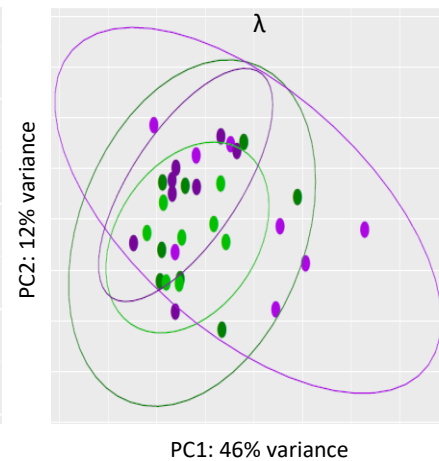

**H. Colon digesta**

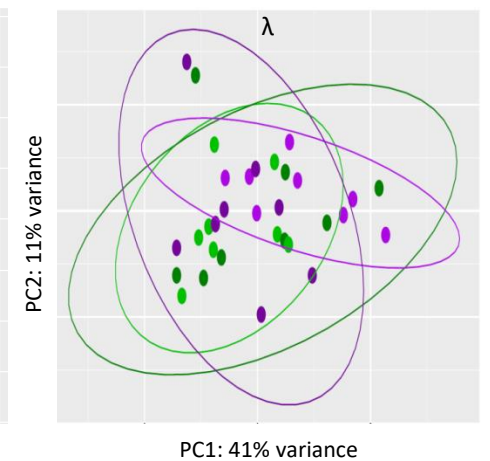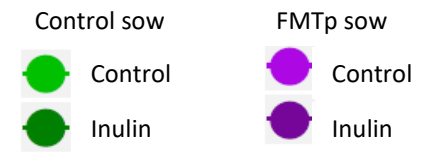

**Fig S1. Microbial diversity variation due to fecal microbiota transplantation (FMT) in sows and/or dietary supplementation of offspring with inulin for 42 days post-weaning in the offspring feces at A. 28, B. 50, C. 65, D. 100 and E. 130 days of age and in the offspring F. ileum, G. cecum and H. colon, represented by principal component analyses (PCA; genus-level).**

The amount of variance is depicted by the percentages on each axis. \*Indicates significant differences at sow x offspring treatment level ( $P \leq 0.05$ );  $\phi$  indicates sow treatment effect ( $P \leq 0.05$ );  $\lambda$  indicates offspring treatment effect ( $P \leq 0.05$ ).

Data from 32 pigs: Sow treatment level control n=16; FMT procedure (FMTp) n=16; Offspring treatment level control n=16; Inulin n=16

### A. Feces

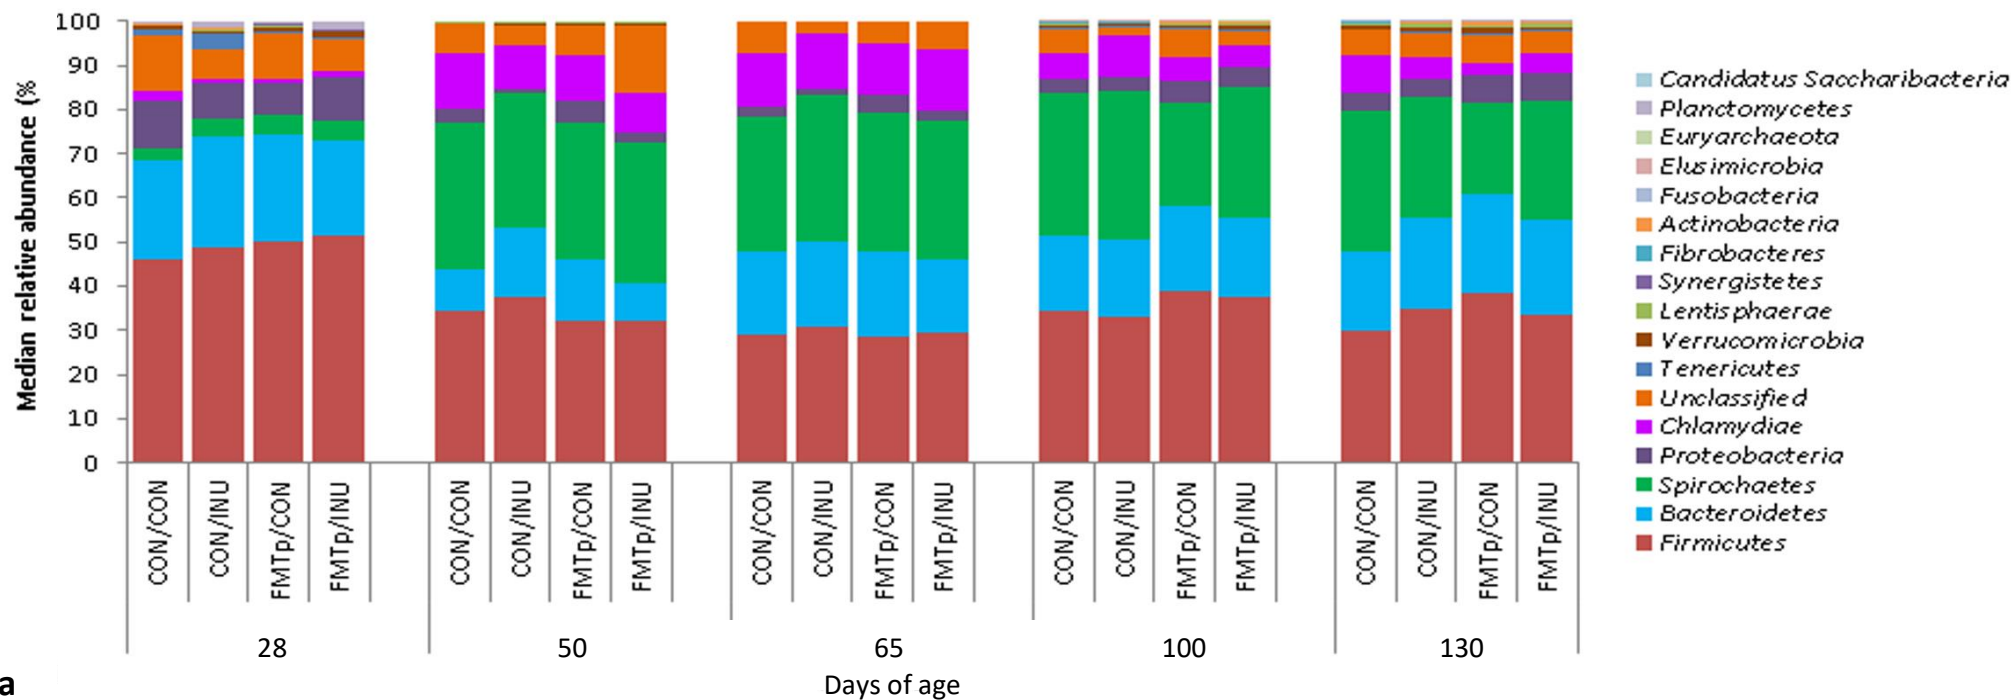

### B. Digesta

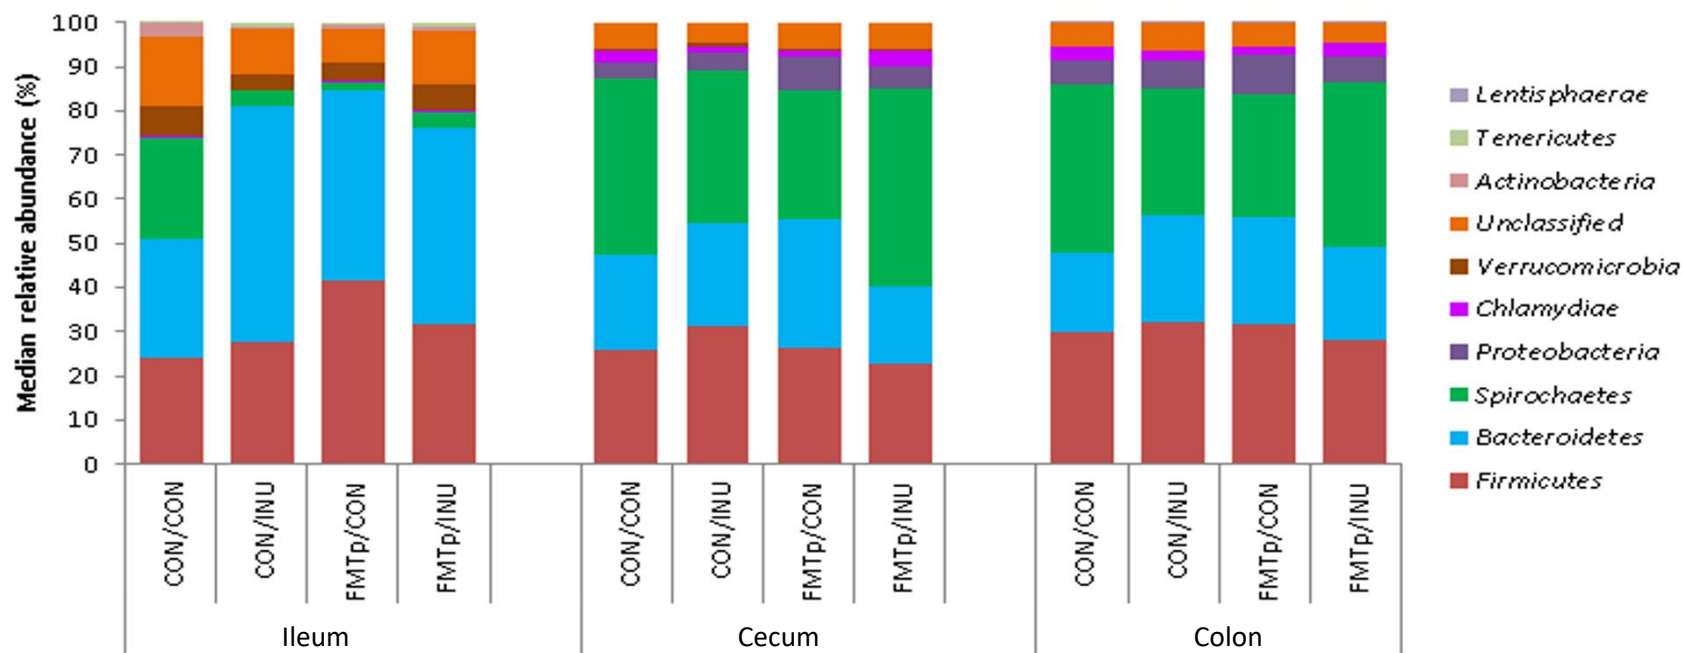

**Fig S2. Effect of fecal microbiota transplantation (FMT) in sows and/or dietary supplementation of offspring with inulin for 42 days post-weaning on microbial composition at the phylum level in offspring in A. feces at 28, 50, 65, 100 and 130 days of age, and B. digesta from ileum, cecum and colon**

Data from 32 pigs: Sow treatment level: control (CON) n=16; FMT procedure (FMTp) n=16; Offspring treatment level: Control (CON) n=16; Inulin (INU) n=16.

Bars represent mean relative abundance of phyla detected for each of the treatments.

### A. Sow treatment

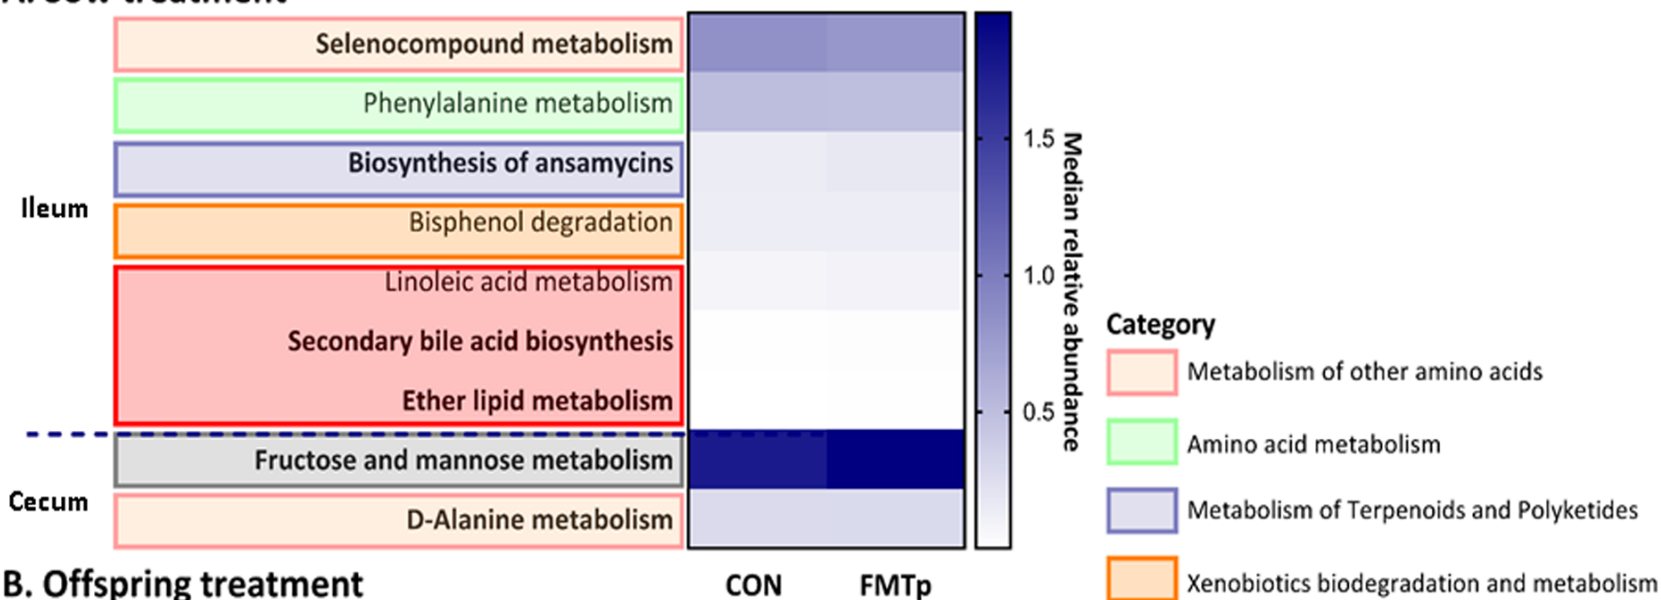

### B. Offspring treatment

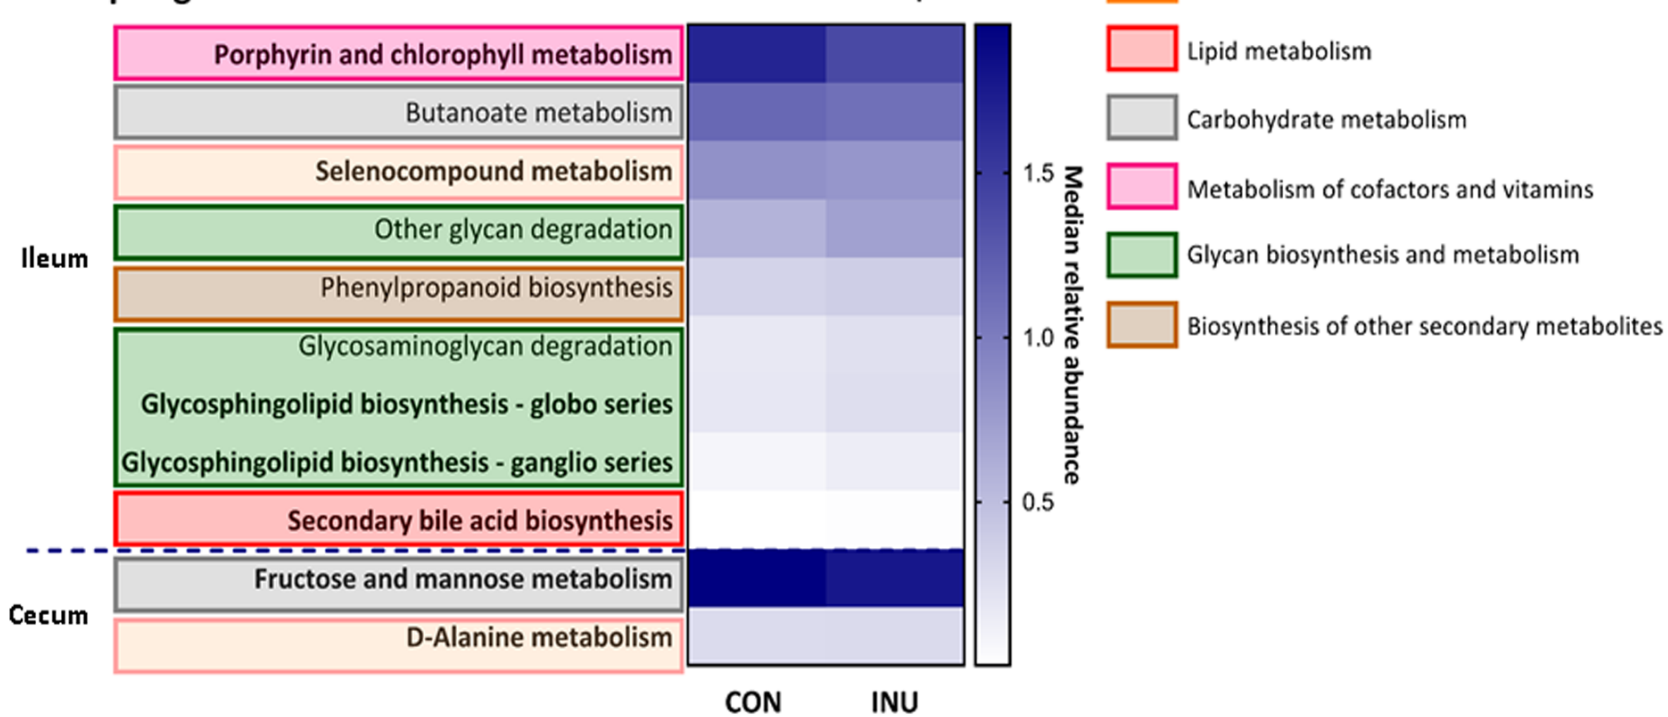

**Fig. S3. Effect of fecal microbiota transplantation (FMT) in sows and/or dietary supplementation of offspring with inulin for 42 days post-weaning on predicted functional pathways for offspring fecal and intestinal microbiota at A. sow and B. offspring treatment level**

Data from 32 pigs: Sow treatment level: control (CON) n=16; FMT procedure (FMTp) n=16; Offspring treatment level: Control (CON) n=16; Inulin (INU) n=16.

Pathways are from the KEGG database and level 3 pathways are presented. Median relative abundance for pathways differing between offspring, due to a sow or offspring treatment effect are represented in the heat maps.

Predicted bacterial pathways in bold depict those also affected by a sow x offspring treatment interaction. Additional sow treatment x offspring treatment interactions not shown in either panel A or B are shown in Table S1.

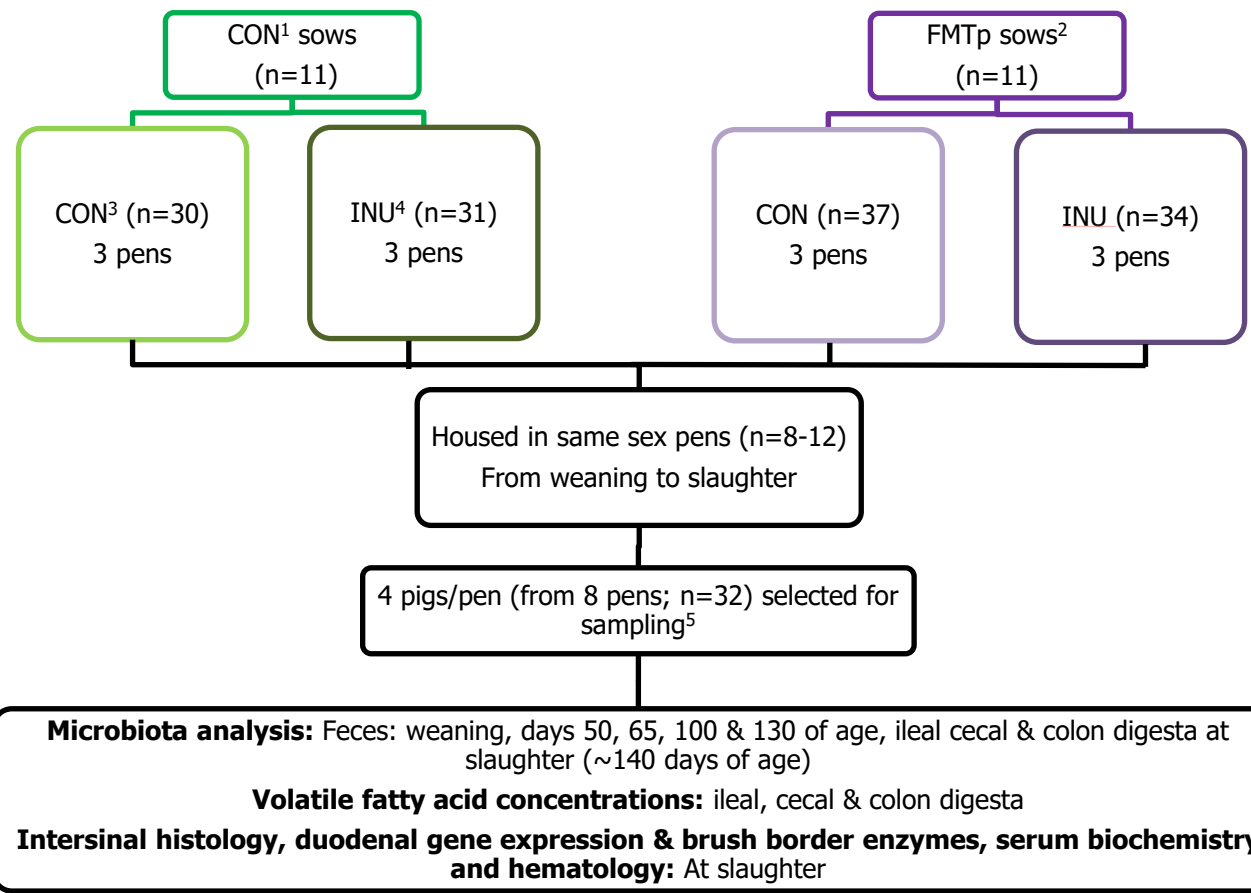



**Fig S4. Schematic depicting sow treatments, offspring treatments and sample collection.**

Sows: <sup>1</sup>CON: control; <sup>2</sup>Fecal microbiota transplantation procedure (FMTp), and were given a 1-week course of antibiotics from day 60 of gestation to kill off as much of the resident microbiota as possible, followed by a purgative and fasting for 36 h to empty the gastrointestinal tract. On days 70 and 100 of gestation, each sow was given 200 mL of thawed inoculum via gastric intubation as well as an anti-acid to prevent inactivation of the inoculum by gastric acid.

Piglets: <sup>3</sup>CON: control or <sup>4</sup>INU: inulin for the first 6 weeks post-weaning (2% for the first 3 weeks, and 3% for the next 3 weeks). Thereafter, all pigs were fed the same finisher diet until slaughter at 140 days of age.

<sup>5</sup>32 pigs selected; Sow treatment level: CON: n=16; FMTp: n=16; Pig treatment level: CON: n=16; INU: n=16.
